# Supplementary material
Source: publisher site journal article supplement (https://www.dovepress.com/article/supplementary_file/547122/Supplemental%20Table%201%20v2_2.docx)
Supplement: Supplementary file 1 [file Supplemental%20Table%201%20v2_2.docx]

**Supplemental Table 1. Characteristics of Published Studies on Charles Bonnet Syndrome**

Supplemental Table 1 provides a comprehensive overview of studies reporting on Charles Bonnet Syndrome, including study design, sample characteristics, prevalence, and features of hallucinations, as well as key limitations. This expanded table complements Table 1 in the main text by offering detailed methodological and outcome data that underpin the scoping review.

| **Study name** | **Authors** | **Date** | **Country** | **Study Design** | **Sample Size** | **Patient Characteristics** | **Outcomes** | **Notes/Limitations** |
| --- | --- | --- | --- | --- | --- | --- | --- | --- |
| Visual Hallucinations and Sensory Delusions in the Elderly | G. E. Berros, P. Brook | 1984 | UK | Cohort | 150 | Age range 65 to 95 years (mean 77, SD ±18). 47 males and 103 females. | 44 (29.33%) patients experienced some form of visual perceptual disturbance. Two patients received a diagnosis of CBS | The sample was collected from a psychogeriatric service, so the real incidence of CBS among the elderly remains unclear |
| Visual hallucinations in ophthalmology | H. M. Olbrich, M. P. Engelmeier, D. Pauleikhoff, T. Waubke | 1987 | Germany | Observational | 43 | Ages ranged between 65 and 93 years. None of the patients had any psychiatric disorder. 14 males and 29 females. Visual acuity of less than 0.3 in the better eye. | 8 cases of visual hallucinations were found among the 43 patients. 5 patients were diagnosed as cases with CBS. 3 patients experienced visual hallucinations for the first time following cataract extraction (post cataract extraction hallucinations). The hallucinations were well defined, brilliantly clear, and patients showed critical insight. | There was strong indication that sensory deprivation was an essential pathogenetic factor. Hallucinations ceased after improvement of vision in some cases. The three post-cataract cases might represent a new subtype of perceptual disorder. |
| Visual Perceptual Disorders Resembling the Charles Bonnet Syndrome. A Study of 434 Consecutive Patients Referred to a Psychogeriatric Unit | L. Norton-Willson, M. Munir | 1987 | UK | Retrospective | 434 | Ages ranged from 65 to 95 years. For the 8 patients with visual perceptual disorders, the female to male ratio was 7:1, and the mean age was 83.8 years (range 73-93 years). | 8 cases (1.8%) of visual perceptual disorders resembling the CBS were identified. All eight patients had eye pathology with impaired vision. | Retrospective study. The reluctance of patients to admit to visions likely conceals the true number of cases. Medication using tranquillizers proved disappointing. The study suggests CBS exists as a distinct entity |
| Visual Hallucinations in Patients with Macular Degeneration | S. Holroyd, P. V. Rabins, D. Finkelstein, M. C. Nicholson, G. A. Chase, S. C. Wisniewski | 1992 | USA | Case-control | 100 | Among the 100 subjects, ages ranged from 41 to 90 years (mean 74.5 years). 75 women and 25 men. In the subgroup of 12 patients with formed hallucinations, ages ranged from 73 to 87 years (mean 78 years), with 11 women and 1 man. | 12% (12 of 100 patients) experienced formed hallucinations CBS. 75% of these 12 patients with formed hallucinations had bilateral choroidal neovascularization. Formed hallucinations were significantly associated with bilateral exudative macular degeneration (P=.001). Poor visual acuity (20/200 or worse) was present in 75% of hallucinators. | Patients often are reticent to share their experiences due to fear of being considered psychiatrically unstable, and in no instance was seeing formed visual hallucinations the chief complaint. The study also found that 59% of patients reported seeing flickering or flashing lights (photopsias). |
| Visual Symptoms Associated With Choroidal Neovascularization Photopsias and the Charles Bonnet Syndrome | G. C. Brown, R. P. Murphy | 1992 | USA | Cross-sectional | 100 | Ages ranged from 41 to 90 years, with a mean age of 74.5 years. For the subgroup with formed hallucinations, the mean age was 78 years, ranging from 73 to 87 years. | 59% of patients experienced photopsias, which were significantly associated with macular subretinal fluid (P=.02), cicatricial scar formation (P=.04), and larger lesion sizes (P=.003). 12% (12 patients) reported formed visual hallucinations, strongly linked to bilateral exudative macular degeneration (P=.001) and severe bilateral visual loss. These hallucinations were generally pleasant, often bilateral, and included images of faces, squares, flowers, animals, or people, lasting from seconds to minutes. | A statistical association was observed between oral levothyroxine use and formed hallucinations (P=.007), but the authors noted this finding was uncertain due to the small number of patients involved. The study suggests that severe visual loss, rather than the neovascularization itself, likely causes formed hallucinations through a "release phenomenon" where sensory deprivation allows cortical impulses to become more evident. Patients often concealed their hallucinations due to fear of being perceived as mentally ill but expressed relief when informed it was a known, non-psychiatric condition. |
| Visual Hallucinations and Mental State | G. Schultz, R. Melzack | 1993 |  |  |  |  |  |  |
| Clinical Evaluation of 14 Patients With the Charles Bonnet Syndrome (Isolated Visual Hallucinations) | R. J. Teunisse, F. G. Zitman, D. C. M. Raes | 1994 | Netherlands | Case series | 14 | Mean age 81.8 years. 13 women and 1 man. 12 subjects were living alone. All patients except one were visually impaired. 12 patients had clinical signs of CNS disorder. | The 14 patients met CBS criteria. None of the patients attributed a personal meaning to the hallucinations. The hallucinations disappeared in all patients when they closed their eyes. Multiformity, not stereotypy, of hallucinations was a particularly impressive feature. Neuroleptics were found to be ineffective in 8 patients. | Small sample size (14 patients). The study modified Gold and Rabins' criteria by excluding "stereotyped" hallucinations. Suggested that CBS is usually associated with ocular pathology and/or cerebral disturbances, and that social isolation could be a contributing factor. |
| The Charles Bonnet Syndrome: A Large Prospective Study in The Netherlands A Study of the Prevalence of the Charles Bonnet Syndrome and Associated Factors in 500 Patients Attending the University Department of Ophthalmology at Nijmegen | R. J. Teunisse, J. A. M. Cruysberg, A. Verbeek, F. G. Zitman | 1995 | Netherlands | Prospective | 500 | Low-vision group: Mean age 70.1 (SD 14.2); mean visual acuity of best eye 0.23 (SD 0.17). Optometry group: Mean age 74.3 (SD 6.5); mean visual acuity of best eye 0.73 (SD 0.25). | The prevalence of CBS in low-vision patients was 11% (33 patients). In the optometry group (control), 1% (2 patients) had CBS. CBS was significantly associated with an age over 64 years (P<0.05) and a visual acuity of 0.3 or less in the best eye (P<0.001). No significant associations were found with ophthalmic diagnoses, patient sex, marital status, or social circumstances. | This was the first major case-finding study on CBS with fixed criteria and a control group. The assumed rarity of CBS in the past may be due to patient reluctance to share experiences. Low visual acuity itself is more strongly associated with the syndrome than specific underlying eye diseases. A sex effect was found to be higher in women but not statistically confirmed. There was a trend toward an association with living alone/bereavement, but it was not statistically significant. |
| The Charles Bonnet Syndrome | A. Fernandez, G. Lichtshein, W. V. R. Vieweg | 1997 | — | Review | — | — | — | — |
| Social and Psychological Characteristics of Elderly Visually Handicapped Patients With the Charles Bonnet Syndrome | R. J. Teunisse, J. R. Cruysberg, W. H. Hoefnagels, Y. Kuin, A. L. Verbeek, F. G. Zitman | 1999 | Netherlands | Case-control | 130 | All subjects were visually handicapped elderly individuals, with ages ranging from 67 to 97 years in the CBS group and 66 to 93 years in the control group, averaging around 78 years. The majority of participants in both groups were female, and there were no significant differences in mean age or visual acuity between the CBS and control groups. | The study found a statistically significant difference in loneliness between the groups, with a majority of CBS patients reporting feeling lonely compared to controls. Additionally, CBS patients scored significantly higher on extraversion and shyness personality traits compared to the control group. | The authors noted that due to the cross-sectional design, they could not draw definite conclusions about the causal nature of the relationships observed. The study design also resulted in no significant differences between the groups regarding age or visual acuity, and it did not support associations between CBS and higher education, maladaptive coping, or bereavement. The authors theorized that a low quality of social contacts or a lack of environmental stimuli might contribute to the etiology of CBS. |
| Hyperperfusion in the lateral temporal cortex, the striatum and the thalamus during complex visual hallucinations: Single photon emission computed tomography findings in patients with Charles Bonnet Syndrome | N. Adachi, T. Watanabe, H. Matsuda, T. Onuma | 2000 | Japan | Case series | 5 | The study involved five patients (two men and three women) who developed CBS at a mean age of 71.6 years. All patients had bilateral severe eye disease, with one patient already blind before the onset of hallucinations, and none had a history of major psychiatric disorders. Their intellectual functioning was assessed as almost intact. | The study found regional cerebral blood flow (rCBF) hyperperfusion in the lateral temporal cortex, striatum, and thalamus in all patients during their visual hallucinations, while rCBF in the occipital lobe remained normal. The authors suggested that asymmetrical blood flow might indicate an over-activation of hemi-structures, with the lateral temporal cortex, particularly the inferior lateral temporal cortex, being the region most likely responsible for the complex visual hallucinations. | The authors noted that the small number of patients limited the ability to draw definitive conclusions. They also cautioned that the evaluation of rCBF changes, based on visual inspection and the region of interest (ROI) method, required careful interpretation. Other limitations included the lack of control conditions and the potential for false negatives due to the qualitative visual assessment. |
| Visual Hallucinations in Patients With Retinal Disease | I. U. Scott, O. D. Schein, W. J. Feuer, M. F. Folstein | 2001 | USA | Cross-sectional | 86 | The study population had a mean age of 62.5 years, with the majority being female (67.4%) and Caucasian (75.6%). The most frequent primary ocular diagnoses were DR (52.3%) and AMD (24.4%). Patients who experienced visual hallucinations were predominantly female (92.3%) and exhibited worse visual acuity, especially bilateral visual impairment (38.5% had 20/200 or worse in both eyes). All hallucinators, except for one with Parkinson's disease, reported no history of stroke or other neurological disease. | The study found a 15.1% prevalence of visual hallucinations among patients with retinal disease. These were mostly formed hallucinations, occurring in clear consciousness and lasting for seconds to minutes. The majority of patients had been experiencing these hallucinations for a relatively short duration (61.5% for less than 1 year, 23.1% for 1 to 2 years). Notably, only two of the 13 patients with hallucinations had informed a physician about them. Statistically significant associations were found between experiencing hallucinations and female sex, worse visual acuity, bilateral visual impairment, emotional distress, decreased functional status, and decreased quality of life. Even among patients with relatively good vision, those with hallucinations reported greater emotional distress and lower quality of life. | A key finding was the low rate of disclosure to physicians, with only 2 out of 13 hallucinating patients having informed a doctor. The study utilized a comprehensive set of questionnaires including the Sickness Impact Profile, Community Disability Scale, General Health Questionnaire, Visual Phenomena Interview, Eysenck Personality Questionnaire, and Telephone Interview for Cognitive Status. A strength of the study was its 100% participation rate for the interviews. |
| Charles Bonnet Syndrome in Glaucoma Patients With Low Vision | R. Nesher, G. Nesher, E. Epstein, E. Assia | 2001 | Israel | Cross-sectional | 89 | The study included glaucoma patients with low vision, defined as visual acuity of 20/80 or less in both eyes. Among the 11 CBS patients, their ages ranged from 60 to 96 years (mean 74.0 years), and the majority were male (8 males, 3 females). These patients had various medical histories, including hypertension, ischemic heart disease, and diabetes. | The study found a 12% prevalence of CBS among the screened glaucoma patients with low vision. The characteristics of the visual hallucinations, such as size, color, clarity, motion, content, frequency, duration, and visual field location, were documented. Notably, in one patient, hallucinations ceased after cataract removal and improvement in visual acuity. | The authors noted that for patients with both macular pathology and advanced glaucoma, it was impossible to estimate the relative contribution of each ocular disease to the overall low vision state. The cognitive status of the patients was only "crudely estimated" using an abbreviated Mini-Mental test. |
| Prevalence of photopsias and Charles Bonnet syndrome: evaluation of eighty cases with low vision | S. Tatlıpınar, S. Kadayıfçılar, B. Eldem, P. Türkçüog ̆lu | 2001 | Turkey | Prevalence | 80 | The patient group consisted of 39 females and 41 males, with an average age of 56.4 years (ranging from 12 to 88 years). All patients had bilateral low vision, with a mean best-corrected visual acuity of 20/400. AMD was the most frequent cause of their low vision (47.5%). Importantly, none of the patients had any psychiatric or mental disorders or were using psychotropic medication, and all were oriented to time, place, and person. | Visual hallucinations and/or photopsias were experienced by 31.25% (25 out of 80) of the patients. Specifically, 15% (12/80) reported formed visual hallucinations (CBS), and 16.25% (13/80) described photopsias. The most common formed hallucinations were people and various animals, occurring more often at night and without other sensory hallucinations (auditory, tactile, etc.). The study found no significant difference in age or sex between patients with and without these hallucinatory phenomena. | A key finding was that CBS is common in patients with low vision and is not age-dependent, challenging previous assumptions. The authors noted the importance of asking patients about visual experiences in a "nonthreatening and noninvasive manner," emphasizing that other low vision patients have similar experiences, which might encourage disclosure. They ensured that patients were screened to exclude any neurological or psychiatric disorders. The study highlighted that simple visual hallucinations (photopsias) should not be overlooked, as further questioning might reveal them to be part of CBS. |
| Tc-99m Ethylcysteinate Dimer Brain SPECT Perfusion Imaging in Ictal Nonepileptic Visual Hallucinations | M. Lorberboym, Y. Lampl, R. Gilad, M. Sadeh | 2002 | Israel | Case series | 9 | The patients had a mean age of 70 years, with an age range of 36 to 87 years. All participants were admitted to the neurology department with nonpsychiatric and nonepileptic visual hallucinations, and patients with psychiatric disease, epilepsy, or metabolic abnormalities were excluded. One specific patient in the study was diagnosed with CBS. | The study assessed regional cerebral blood flow (rCBF) using SPECT during acute hallucinations and a follow-up scan for interictal states. In one patient diagnosed with CBS, the "ictal" SPECT showed a "hot focus" (hyperperfusion) in the left parieto-occipital region during hallucinations. This hyperperfusion resolved markedly after 7 days of treatment with carbamazepine and haloperidol. | The study included a small number of patients (nine), which could limit the generalizability of its findings. While it did not explicitly state limitations, the detailed results focused on one patient with CBS, suggesting it might be considered more of a case series observation. The strict exclusion criteria, including psychiatric, epileptic, or metabolic conditions, ensured a focused patient population. |
| Complex Visual Hallucinations in the Visually Impaired: The Charles Bonnet Syndrome | G. J. Menon, I. Rahman, S. J. Menon, G. N. Dutton | 2003 | — | Review | — | — | — | — |
| Visual hallucinations and Charles Bonnet Syndrome after photodynamic therapy for age related macular degeneration | S. Y. Cohen, A. Bulik, R. Tadayoni, G. Quentel | 2003 | France | Prospective | 100 | The participants were patients with AMD and predominantly classic choroidal neovascularisation (CNV), treated with photodynamic therapy (PDT). The cohort included 58 women (58%) and 42 men, with an age range of 50–95 years. Patients who experienced structured hallucinations (CBS) had a mean age of 82 years (range 77–88). | The study found that 5% (5 patients) described transient structured visual hallucinations, characteristic of CBS, which included faces and geometric patterns. An additional 15% (15 patients) reported unstructured visual hallucinations such as photopsias and flashing lights. These symptoms typically occurred a few days after PDT, and the study found no significant differences in age, sex, or visual acuity between patients with structured hallucinations and those without. | The study acknowledged that the prevalence of CBS might be underestimated due to patients' fear of being thought mentally ill, which often prevents spontaneous disclosure of hallucinations. There was a potential "flaw in how the information was elicited" regarding baseline hallucinations before treatment, as patients were primarily asked if they experienced hallucinations 6 to 12 weeks after PDT, with a follow-up question about prior experiences. The authors emphasized the need to include the possibility of visual hallucinations in pre-treatment patient information and systematically screen for their occurrence post-treatment to alleviate patient anxiety. |
| Charles Bonnet syndrome in Asian patients in a tertiary ophthalmic centre | C. S. H. Tan, V. S. Y. Lim, D. Y. M. Ho, E. Yeo, B. Y. Ng, K. G. Au Eong | 2004 | Singapore | Prospective | 1077 | The study included patients aged 50 years and above attending a comprehensive ophthalmology clinic, with a mean age of 67.9 years (range 50–104). Patients with a history of psychiatric illness, epilepsy, organic brain lesions, drug/alcohol dependence, dementia, or those experiencing only simple hallucinations like photopsias were excluded. The four patients ultimately diagnosed with CBS had a mean age of 76.3 years (range 65–90), with ocular conditions including cataracts and glaucoma. | The study found a 0.4% prevalence of CBS among the screened Asian patients, which was noted as slightly lower than in comparable non-Asian populations. This was the first reported epidemiology of CBS in Asian patients. A wide variety of visual hallucinations were reported, consistent with previous literature, and three of the four CBS patients experienced a negative reaction to their hallucinations. The study also suggested that reduced visual acuity might not be a prerequisite for CBS. | The authors noted that the prevalence of CBS might be underestimated due because patients often do not spontaneously report their hallucinations due to fear of being perceived as mentally ill. Due to the small number of CBS cases identified (only four), the study was unable to determine specific risk factors for the syndrome. They also suggested that cultural differences might contribute to variations in reported prevalence, noting that their patients did not express fear of being labeled psychiatrically unstable, unlike those in other regions. |
| The rarity of Charles Bonnet syndrome | Y. Shiraishi, T. Terao, K. Ibi, J. Nakamura, A. Tawara | 2004 | Japan | Cross-sectional | 1000 | The screened patients had a mean age of 51.3 years and a mean corrected visual acuity of 1.1 in their best eye (log MAR units). The majority were women (547 out of 1000). All five patients diagnosed with CBS were women, with a mean age of 54.6 years, and ametropia was the most common cause of their visual impairment. | The study found a prevalence of CBS of 0.5% (5 out of 1000 patients). The authors noted that this low prevalence might be attributed to the relatively good visual acuity of their patient cohort, in contrast to studies with higher reported prevalences that focused on patients with visual acuity less than 0.3. The characteristics of the visual hallucinations in the CBS patients were consistent with those previously described in the literature. | The study acknowledged that the prevalence of CBS varies widely across different studies due to inconsistencies in diagnostic criteria, diverse patient samples, and patients' reluctance to disclose hallucinations. A key methodological limitation was the screening questionnaire's sensitivity of 50% (though specificity was 100%), which the authors suggested could have contributed to the low observed prevalence. The authors concluded that CBS appears to be rare in ophthalmologic and optometric patients who do not have seriously low vision. |
| The Possible Role of Vision Rehabilitation in the Treatment of Visual Hallucinations in the Elderly | D. Anderson, L. Pankow, D. Luchins | 2004 | — | Review | — | — | — | — |
| The Charles Bonnet syndrome: a review of recent research | B. W. Rovner | 2006 | — | Review | — | — | — | — |
| Visual Hallucinations in Patients with Age-Related Macular Degeneration (AMD) | S. P. Lannon, M. R. Stevenson, S. T. White, J. F. Logan, A. H. Reinhardt-Rutland, A. J. Jackson | 2006 | Northern Ireland | Cross-sectional | 145 | Participants were aged 65 years or more, with a mean age of 78 years for the combined low vision groups and 75 years for controls. The low vision groups had a primary diagnosis of bilateral AMD. The control group consisted of relatives of patients or individuals from a local community support group, without a history of AMD. Patients with early dementia or mental health problems associated with depression and anxiety were noted in the hallucinating group. | Outcomes: 40% of patients reported visual hallucinations, and CBS was prevalent in 21% of the low vision cases. The study found that visual hallucinations were more likely to occur when the visual acuity of the better eye fell from a mean of 20/120 to 20/200. Visual acuity, rather than age, was identified as the primary factor contributing to a higher incidence of visual hallucinations in low vision patients. | Limitations or other notes about the study: The study highlighted that the determination of hallucinations as "simple" or "complex" relies on clinical judgment, and variations in CBS diagnostic criteria exist. A limitation was the lack of an independent formal mental state examination by a psychiatrist or other mental health professional to rule out differential diagnoses. The authors also suggested that a larger population sample might yield additional or different outcomes. |
| Visual Loss and Visual Hallucinations in Patients with Age-Related Macular Degeneration (Charles Bonnet Syndrome) | E. J. Abbott, G. B. Connor, P. H. Artes, R. V. Abadi | 2007 | UK | Cross-sectional | 66 | The participants were elderly patients with bilateral AMD, bilateral central scotoma, and best monocular visual acuity poorer than or equal to 0.6 logMAR (6/24 Snellen). They had intact cognition as determined by specific screening tools. The age range was 63–96 years, with a mean age of 81.2 years. | The study found a prevalence of CBS of 40% among the AMD population, noting that this figure was highly dependent on the inclusion criteria used. While patients with VHs were slightly younger, and had apparently lower visual acuity and more extensive visual field loss, only age emerged as a statistically significant predictor of VH, with younger patients more likely to report VHs. The extent of visual loss did not predict the likelihood of experiencing VHs or their complexity. The most common hallucination contents were faces (32%) and patterns (27%). | The authors acknowledged that prevalence estimates are highly dependent on inclusion criteria, which makes comparisons across studies difficult. A "major weakness" of a referenced study (Pliskin et al., 1996) was highlighted as the lack of a matched control group. The study's own small sample size limited the ability to determine certain relationships, and it also noted that most patients (71%) had no prior knowledge of CBS, and in England, there was a common fear of being labeled psychiatrically unstable for reporting hallucinations. The study suggested that cognitive factors, such as state of arousal, may play a central role in the appearance of VHs once visual loss reaches a critical threshold. |
| A semi-structured interview to assess visual hallucinations in older people | U. P. Mosimann, D. Collerton, R. Dudley, T. D. Meyer, G. Graham, J. L. Dean, D. Bearn, A. Killen, L. Dickinson, M. P. Clarke, I. G. Mckeith | 2008 | UK | Pilot | 114 | The participants were elderly individuals, aged 60–98 years, with the patient group being generally older, less educated, and more impaired cognitively and visually compared to controls. The primary ocular diagnosis for most patients (80%) was AMD, with some also having glaucoma, cataracts, or other eye pathologies. | The study found that recurrent visual hallucinations were common in the patient group (68.8%) but absent in the control group (0%). The developed NEVHI demonstrated good criterion, face, and content validities and high internal consistency for screening questions, with good inter-rater agreements for both simple and complex hallucinations. Four key factors associated with experiencing hallucinations were identified: perceived control, pleasantness, distress, and awareness. | The study highlighted that the subjective nature of hallucinations led to a lack of agreement between patient and informant reports, suggesting that informants might underestimate certain aspects. The authors recommend that a comprehensive assessment should include both patient and informant views. They also noted that initial screening questions should ideally avoid the term "hallucination" because some patients do not use this term themselves. |
| Charles Bonnet Syndrome in Age-Related Macular Degeneration: The Nature and Frequency of Images in Subjects with End-Stage Disease | J. C. Khan, H. Shahid, D. A. Thurlby, J. R. W. Yates, A. T. Moore | 2008 | UK | Case-control | 360 | Participants were 360 Caucasian patients with end-stage AMD, with a mean age of 80.3 years. They were required to be able to volunteer, attend clinics, and complete questionnaires and interviews, with any subject reporting a history of dementia-type illness excluded to ensure intact cognition. | The study found a prevalence of CBS of 27% among patients with end-stage AMD. Poor visual acuity in the better eye was identified as the most important risk factor for developing CBS, with an odds ratio of 3.50 for those with best binocular visual acuity worse than 6/36. Being married or living with someone also showed a significant association, with an odds ratio of 2.22. The most common hallucinations were of people (19.6%) and geometric patterns (15.8%), with the majority (71.1%) perceiving them as neither pleasant nor unpleasant. | A primary limitation was the lack of formal cognitive testing for participants, although gross cognitive impairment was excluded through the recruitment process. The study's findings challenged the idea that social isolation is a contributing factor to CBS, as living with someone was associated with a higher odds ratio for CBS. It was also noted that CBS symptoms did not always resolve with the duration of the disease in a significant proportion of patients, and patients were often relieved to understand the cause of their hallucinations. |
| Vision Rehabilitation and Charles Bonnet Syndrome | K. E. Crumbliss, M. J. Taussig, W. M. Jay | 2008 | USA | Prospective | 50 | The participants were patients attending a low vision clinic, with a mean age of 74.14 years (range 23-95 years). The most common cause of vision loss was Macular Degeneration. The cohort was predominantly Caucasian (49 out of 50 patients), and patients underwent cognitive function screening to rule out significant impairment. There were no statistically significant differences in age, gender, visual acuity, or cognitive function between patients with and without CBS. | The study found a prevalence of CBS of 24% among the surveyed low vision patients, with 50% of these experiencing daily hallucinations. Low Vision Rehabilitation (LVR) led to a decrease in hallucination frequency for 3 out of 11 (27.3%) patients, by an average of 43.33%. However, there was no significant correlation between visual acuity improvement and the decrease in hallucinations. | The study highlighted that the prevalence of CBS can vary depending on study design and patient comfort in disclosing hallucinations, noting that the condition is often not self-reported. A limitation was that there is no consensus on the requirement of vision loss to diagnose CBS. The authors emphasize the importance of direct questioning to identify CBS patients and providing patient education and reassurance about the benign nature of the visual hallucinations. |
| Butterflies and black lacy patterns: the prevalence and characteristics of Charles Bonnet hallucinations in an Australian population | M. Vukicevic, K. Fitzmaurice | 2008 | Australia | Cross-sectional | 300 | Participants were older adults with visual impairment, aged 60 years or older (mean age 77.7 years for the hallucinating group), with best-corrected visual acuity of 6/12 or less. They were excluded if they had psychiatric disorders, other sensory hallucinations, or took medications known to cause visual hallucinations. | The study found a prevalence of CBS of 17.5% in the screened population. While the hallucinating group was predominantly female, this was not a statistically significant difference from the non-hallucinating group. A significant finding was that 70% of participants with visual hallucinations also reported hearing loss, compared to 30% in the non-hallucinating group, though this hearing loss did not correlate with hallucination characteristics. | The study highlighted its small sample size for the visual hallucination (VH) group as a major impediment. It was limited to participants aged over 60 years, and the authors suggested that a psychological or psychiatric examination would be necessary for more accurate screening to definitively rule out other etiologies for hallucinations. The possibility of under-reporting of CBS symptoms was also noted. |
| Six Cases of Charles Bonnet Syndrome Presenting in Neuro-Ophthalmology Clinic | A. Koh, Y. Nakai, M. Shiokawa, R. Higa, K. Shidara, R. Moriyama, M. Wakakura | 2009 | Japan | Retrospective | 6 | The participants ranged in age from 52 to 79 years. All patients had severe bilateral visual loss (visual acuity <0.2). Their underlying conditions included bilateral optic neuropathies or retinopathies, high myopic chorioretinal atrophy, Leber heredity optic neuropathy, cone dystrophy, or uveal coloboma and cataracts. Patients with mental disorders were excluded. | The study found that patients experienced various types of visual hallucinations which persisted for durations ranging from 5 months to 13 years. It concluded that CBS is not uncommon in neuro-ophthalmology clinics and that these hallucinations can be long-lasting. The study observed a higher incidence of CBS in men than in women within this small cohort. | A key point noted by the authors is that their patients were generally younger (ages 52-79 years) compared to those in some other studies, suggesting that CBS is not confined to the elderly. Given its small sample size of only 6 patients and retrospective design, the generalizability of its findings would be limited. The study also emphasized that clinicians in neuro-ophthalmology clinics should consider CBS in patients presenting with hallucinations. |
| Charles Bonnet syndrome: a review | A. P. Schadlu, R. Schadlu, J. B. Shepherd III | 2009 | — | Review | — | — | — | — |
| Perceived Color of Hallucinations in the Charles Bonnet Syndrome Is Related to Residual Color Contrast Sensitivity | S. A. Madill, G. Lascaratos, G. B. Arden, D. H. Ffytche, | 2009 | UK | Case series | 10 | Participants were 10 patients (9 women, 1 man) with CBS resulting from AMD, with a mean age of 75 years (range 67–92 years). Their median best-corrected Snellen visual acuity was 20/200, and they were specifically recruited if they were hallucinating in a predominant color or combination of colors. | The study suggested a correlation between visual hallucination susceptibility and psychophysically defined visual sensitivity. It posited that a selective loss of cortical inputs from one visual axis might lead to hypersensitivity and hallucinations, or that hallucinations could be related to a relatively preserved visual axis. None of the patients reported a subjective change in color perception. | A primary limitation of this study was its small sample size. The authors noted that further studies would be required to distinguish between the two proposed possibilities regarding the relationship between cortical input loss and hallucinations. |
| Neuroimaging studies in patients with Charles Bonnet Syndrome | H. Kazui, R. Ishii, T. Yoshida, K. Ikezawa, M. Takaya, H. Tokunaga, T. Tanaka, M. Takeda | 2009 | — | Review | — | — | — | — |
| Visual hallucinations in eye disease | D. H. Ffytche | 2009 | — | Review | — | — | — | — |
| An examination of the relationship between low vision and Charles Bonnet syndrome | G. Gilmour, C. Schreiber, C. Ewing | 2009 | Canada | Prospective | 509 | Low-vision patients were 40 years and older, with a visual acuity of 20/40 or less in the better-seeing eye or a reduced visual field of 120° or less. The control group consisted of individuals of similar age who had better than 20/40 vision and a binocular field greater than 120°. Both groups excluded participants who failed a MMSE with a score below 22. The study intentionally included patients on medications known to cause hallucinations to assess if CBS was an isolated phenomenon or associated with such drugs. | The study demonstrated a link between CBS and the level of low vision. It found that 61% of subjects did not initially report their hallucinations in the first month, but 41% began to disclose them after this period. Only a small fraction, 9% of subjects, sought medical advice, and only half of those received a satisfactory explanation of CBS. While most emotional reactions were neutral, 34% of females experienced negative initial reactions, with 14% feeling psychotic. Additionally, CBS was found to be twice as likely to occur in individuals with visual acuities ranging between 20/300 and 20/800. The study concluded that while no specific treatment is necessary, ophthalmologists should explain CBS to patients for reassurance. | The study highlighted the need for further research concerning medications, CBS, and low vision. It noted that much information on CBS is primarily found in psychiatric journals rather than ophthalmological ones, suggesting a need for increased awareness among ophthalmologists. The study also pointed out that despite the screening procedure, some patients might still have been reluctant to admit to experiencing CBS, potentially leading to an underestimation of its incidence. |
| The prevalence and clinical characteristics of Charles Bonnet Syndrome in Danish patients with neovascular age-related macular degeneration | A. Singh, T. L. Sørensen | 2010 | Denmark | Prevalence | 300 | Participants were 300 consecutive patients with neovascular AMD, attending assessment consultations following variable series of ranibizumab therapy. Patients were excluded if they had a history of psychiatric or neurological disease (such as schizophrenia, dementia, Parkinson's disease), substance abuse, or were taking medications known to cause visual hallucinations, and only those reporting complex and recurrent hallucinations were considered to have CBS. There was a predominance of women in the participating group, though a specific gender effect was difficult to identify. | The study found that CBS is not uncommon in an unselected population with neovascular AMD. Patients with CBS had significantly larger areas of geographic atrophy (median 2 mm²) compared to those without CBS (median 0.3 mm²). No significant difference was found in subfoveal photoreceptor integrity or degree of subfoveal fibrosis between groups, and no association was found between age and CBS symptoms. | The authors noted that a specific gender effect was difficult to identify due to the predominance of women in the study group. They also acknowledged that variations in reported CBS prevalence might stem from different selection criteria across studies. The study suggested that larger areas of geographic atrophy, lacking visual inputs, might be more prone to causing hallucinations, though no direct correlation was found between atrophy size and visual acuity, potentially because some atrophy areas were extrafoveal. |
| Charles Bonnet Syndrome: A Review of the Literature | L. O'Farrell, S. Lewis, A. Mckenzie, L. Jones | 2010 | — | Review | — | — | — | — |
| Clinical Phenomenology and Mortality in Charles Bonnet Syndrome | M. I. Lapid, M. C. Burton, M. T. Chang, T. A. Rummans, S. S. Cha, J. A. Leavitt, B. F. Boeve | 2012 | USA | Retrospective | 77 | The participants had a mean age of 79.5 years and were predominantly Caucasian (97%) and female (73%). While most were over 65, nine patients were younger than 65. The most frequent ophthalmologic conditions were cataracts (56%) and macular degeneration (49%), and all patients reported complex hallucinations with insight into their unreality. | A significant finding was that 26% of patients subsequently developed a dementia syndrome, most often Lewy body dementia. The study also found a high mortality rate, with 60% of patients dying during an average follow-up of 33 months. Factors associated with increased mortality included older age (75-84 years and >85 years) and renal disease, though overall medical burden was not a predictor. The overall mortality rate was significantly higher compared to the age, calendar year, and gender-matched general Minnesota population, suggesting CBS might be a marker for mortality. | The authors acknowledged that it was a retrospective study, relying on the accuracy of medical records, and did not use more rigorous methods to confirm CBS diagnoses. The sample size was small, and there was no control group. The study was also limited by inconsistent follow-up, as subsequent medical complications and deaths might not be fully captured for patients seen at a tertiary referral center. It was noted that some patients might have had early Lewy body dementia, which could affect their classification. The authors recommended larger longitudinal prospective studies to better characterize the relationship between CBS, age, medical comorbidity, and mortality. |
| The prevalence and clinical characteristics of Charles Bonnet syndrome in Chinese patients | Y. Hou, Y. Zhang | 2012 | China | Cross-sectional | 432 | Participants were 432 consecutive new inpatients aged 60 years and above from an ophthalmic center. Patients with a history of psychiatric or neurological disease (such as schizophrenia, dementia, Parkinson's disease), substance abuse, or who were taking medications known to cause visual hallucinations were excluded from a CBS diagnosis. Crucially, insight into the unreal nature of the hallucinations was required for a CBS diagnosis. | The study found a prevalence of CBS of 1.4% in this population of elderly, visually handicapped Chinese patients. The clinical characteristics of the hallucinations varied greatly among patients, and none of the CBS patients had pathological confirmation of Rapid Eye Movement Behavior Disorder. | The authors acknowledged that their inferences were limited by the small sample size of CBS cases (n=6), making them vulnerable to bias and hindering definite conclusions about the relationship between CBS and associated variables. They also suggested that variations in reported CBS prevalence might be due to real differences between Chinese and white populations, potentially related to genetics or visual pathway structure, as well as inconsistencies in diagnostic criteria, questioning methods, and patients' reluctance to disclose hallucinations. The study emphasized the need for further research to investigate CBS prevalence in the general population. |
| Charles Bonnet syndrome: a literature review into diagnostic criteria, treatment and implications for nursing practice | D. F. Hughes | 2013 | — | Review | — | — | — | — |
| Low awareness of the Charles Bonnet syndrome in patients attending a retinal clinic | A. Singh, Y. Subhi, T. L. Sørensen | 2014 | Denmark | Cross-sectional | 200 | Participants were consecutive patients attending a retina clinic, primarily being assessed for treatment response to anti-VEGF for exudative AMD or other retinal conditions. The mean age of participants was 78.5 years, with a predominance of females (69.5%), and the majority (91.5%) had AMD. Patients with elementary hallucinations (like photopsias or shadows) or a history of psychiatric or neurological disease were not included in the CBS cohort. | The study revealed that a low proportion of visually impaired patients (12%) were familiar with CBS. However, 15% of the participants admitted to experiencing complex visual hallucinations characteristic of CBS. Low visual acuity and university education were found to be independently associated with familiarity with CBS. | The authors acknowledged several limitations, including the telephone interview format, which might have affected the validity of responses due to potential difficulties in hearing, apprehending questions, or the presence of others. There was also a potential for selection bias, as some patients refused to participate or could not be reached. The use of time since first presentation as a surrogate marker for the duration of disease was also noted as a limitation, as it might not accurately reflect the duration of visual impairment. |
| Prevalence and clinical characteristics of Charles Bonnet syndrome in Madrid, Spain | E. Santos-Bueso, F. Sáenz-Francés, M. Serrador-García, J. Porta-Etessam, J. M. Martínez-De-La-Casa, J. García-Feijoo, J. García-Sánchez | 2014 | Spain | Prevalence | 2502 | The study focused on patients with severe visual deterioration and no cognitive impairment. Among the diagnosed CBS patients, the majority were women over 80 years of age (58.3%), with the primary associated ocular pathologies being AMD (58.3%) and glaucoma (25%). | The study found a CBS prevalence of 0.47% in the general population of patients at the Hospital Clínico San Carlos (HCSC), which increased to 15% when limited to patients with low vision. The visual hallucinations reported by CBS patients most commonly involved animals (50%), were colored (58.3%), and moving (75%), with a frequency of three times a day (75%) and durations of 3-5 minutes (50%). | The authors explicitly stated that the incidence of CBS is underestimated due to both patients' fear of being branded mentally ill and physicians' lack of knowledge regarding the condition. They advocate for new studies to improve awareness and for multidisciplinary collaborative work involving ophthalmologists, neurologists, and psychiatrists for effective diagnosis and management of this complex syndrome. |
| Negative outcome Charles Bonnet Syndrome | T. M. Cox, D. H. Ffytche | 2014 | UK | Cross-sectional | 1254 | Participants were members of the Macular Society who reported a diagnosis of macular disease and experienced visual hallucinations, which included patterns, faces, objects, figures, and animals. The majority of participants were unfamiliar with CBS at symptom onset. | The study found that CBS is a long-lasting condition, with 75% of patients experiencing hallucinations for 5 years or more. A significant proportion, 32%, reported negative outcomes, which were associated with frequent, fear-inducing, and longer-lasting hallucination episodes, impact on daily activities, attributing hallucinations to serious mental illness, and a lack of awareness about CBS at onset. The study suggested that interventions focused on reducing the frequency, duration, or fear of hallucinations, as well as pre-onset education, could help reduce these negative outcomes. | The authors noted that the definition of negative outcome was based on self-report and lacked formal psychopathology or quality of life measures. The sample, being from a voluntary society, might introduce selection bias, potentially underrepresenting those with shorter CBS durations. The study also highlighted the low rate of medical advice-seeking (less than half) among CBS patients, which limits the effectiveness of interventions aimed at training medical professionals. |
| Charles Bonnet syndrome: characteristics of its visual hallucinations and differential diagnosis Síndrome de Charles Bonnet: características | T. C. Vale, L. C. Fernandes, P. Caramelli | 2014 | Brazil | Case series | 8 | Five of the eight patients were male (62.5%), with a mean age of 52.3 ± 16.0 years. Their ocular pathologies included severe myopia and glaucoma (two patients), retinitis pigmentosa (three patients), anterior ischemic optic neuropathy (one patient), AMD (one patient), and toxoplasmic retinochoroiditis (one patient). Patients had significant visual impairment and no other psychiatric or neurodegenerative diseases. | All patients experienced complex visual hallucinations, which mostly occurred on a weekly basis (62.5%) and typically lasted for seconds (87.5%). There was a mean delay of 41.7 months between the onset of visual hallucinations and the diagnosis of CBS by clinicians. | The authors emphasize that the prevalence of CBS is certainly underestimated due to low disclosure by patients, lack of knowledge among physicians, variable inclusion criteria, and inconsistent depth of questioning. They recommend that physicians caring for low vision patients should be aware of CBS and appropriately diagnose its hallucinations after excluding psychiatric and neurologic diseases. The study also notes that while the most common cause of CBS is age-related macular degeneration, many other etiologies are involved. |
| Charles Bonnet Syndrome in Advanced Retinitis Pigmentosa | F. O’Hare, S. A. Bentley, Z. Wu, R. H. Guymer, C. D. Luu, L. N. Ayton | 2015 | Australia | Cross-sectional | 72 | Participants were individuals with advanced retinitis pigmentosa (RP) and severe vision impairment, defined as visual acuity less than 20/200 in the better eye and/or a visual field restriction to less than 10 degrees. Patients were excluded if they were taking medications known to cause visual hallucinations, had a history of recreational drug use or any psychological condition (including cognitive dysfunction), or lacked sufficient English language skills. | The primary outcome was to determine the presence of visual hallucinations (CBS) among this specific visually impaired population. However, the provided excerpt does not state the specific prevalence rate or the number of participants who reported visual hallucinations in this study. | The study aimed to establish the prevalence of CBS in advanced RP, a condition for which prevalence was previously unclear. To isolate CBS, the researchers excluded participants with potential confounding factors such as hallucinogenic medications, recreational drug use, or any psychological/cognitive dysfunction, which could influence the generalizability to a broader population. |
| Charles Bonnet syndrome in older adults with age-related macular degeneration: Its relationship to depression and mild cognitive impairment | H. Boxerman, W. Wittich, O. Overbury | 2015 | Canada | Cross-sectional | 42 | The participants were older adults with a diagnosis of AMD, recruited from a vision rehabilitation center. Their mean age was 85.5 years (range 68–99 years), and there was a predominance of females (31 out of 42 participants). Visual acuity in the better eye ranged from 20/70 to 20/1200. Exclusion criteria included diagnoses of Alzheimer's disease, clinical depression, other psychiatric illness, or use of anti-psychotic or selective serotonin reuptake inhibitor (SSRI) medications. | The study found that participants experiencing CBS did not statistically show a higher likelihood of developing depression and/or MCI compared to those without CBS. Overall, 30% of the sample showed a risk of depression, and 62% were at risk of cognitive decline based on MoCA scores. | The authors acknowledged several limitations, including the small sample size, which might have limited the ability to detect smaller effects. They also noted the potential for underreporting of CBS symptoms due to patients' reluctance to disclose visual hallucinations for fear of being perceived as mentally ill, especially to a researcher with whom they hadn't developed a trusting relationship. The study was conducted at only one rehabilitation center, and participants were limited to those with AMD, meaning the findings might not be generalizable to those with other ocular pathologies. |
| Hallucinations Experienced by Visually Impaired: Charles Bonnet Syndrome | L. Pang | 2016 | — | Review | — | — | — | — |
| The Prevalence and Characteristics of Charles Bonnet Syndrome in Turkish Patients with Retinal Disease | S. Nalcaci, O. İlim, Z. Oztas, C. Akkin, A. Acarer, F. Afrashi, J. Mentes | 2016 | Turkey | Prevalence | 264 | The study screened 264 patients with various retinal diseases and a best-corrected visual acuity (BCVA) of ≤ 20/40 in their better-seeing eye. The mean age of the screened population was 72.1 years (range 31–90), with a slight majority of males (52.7%). Patients were excluded if they had neurological or psychiatric diseases, used antipsychotic or potentially hallucinogenic drugs, had severe metabolic problems, or scored below 18 on the MMSE. | The study diagnosed CBS in 17 patients (6.4%) of the screened population. Among those with CBS, 14 patients (82.3%) experienced complex hallucinations, while 3 (17.7%) had noncomplex hallucinations. The authors concluded that CBS is not uncommon in visually impaired patients with retinal disease and that clinicians should be aware of the condition. | The authors acknowledged that the reported prevalence of CBS varies significantly due to differences in patient populations, inclusion/exclusion criteria, mental status evaluation techniques, and cultural groups. They emphasized that CBS is often underdiagnosed due to patients' reluctance to disclose symptoms and limited clinician awareness, highlighting the need for further studies with standardized protocols in diverse populations. |
| Prevalence of visual hallucinations in a national low vision client population | K. D. Gordon | 2016 | Canada | Cross-sectional | 2565 | Participants were new clients older than 40 years attending a CNIB vision rehabilitation clinic. They had vision loss caused by various eye diseases, including AMD, DR, and glaucoma. Visual acuity and visual field information were provided by their ophthalmologist or optometrist. | Overall, 18.8% of participants reported experiencing visual hallucinations. Women were more likely to experience hallucinations than men (odds ratio [OR] 1.32, p=0.02), and clients with greater vision loss were more susceptible (OR 1.49, p=0.0005). Additionally, people living with others were more likely to have hallucinations than those living alone (OR 1.54, p=0.0009). No significant difference was found in the likelihood of hallucinations based on specific eye disease (AMD, DR, or glaucoma) or between younger and older participants (ages 40-80 vs. ≥81 years). | The study acknowledged that it did not assess contrast sensitivity, a factor known to correlate with visual hallucinations. The authors also noted that while "visual hallucinations" and "CBS" were used interchangeably, there's a possibility some hallucinations might be due to causes other than vision loss, and no attempt was made to confirm a CBS diagnosis. The study highlighted the variability in reported CBS prevalence due to inconsistent diagnostic criteria and questioning methods, and the challenge of overcoming patients' reluctance to disclose symptoms. Despite careful wording, some underreporting might have occurred. The large sample size allowed for comparisons across various subgroups. |
| Charles Bonnet's syndrome: not only a condition of the elderly | H. M. Elflein, M. Rudy, K. Lorenz, K. A. Ponto, A. Scheurich, S. Pitz | 2016 | Germany | Prospective | 324 | Participants were individuals aged 13 years and above, recruited based on their age (≤40 or >40 years) and visual impairment status (visual acuity ≤0.3 Snellen in the better-seeing eye for visually impaired; >0.5 for non-visually impaired). All subjects had to pass the DemTect test and the MMSE-Blind to rule out demential or other psychological illnesses. | The study found that the prevalence of visual hallucinations was 4.9% among young visually impaired subjects and 6.2% among elderly visually impaired subjects, with no statistically significant difference between these age groups. Importantly, no subject without visual impairment experienced visual hallucinations. The study also noted that young CBS subjects tended to see people, while older CBS subjects tended to see objects. | The authors acknowledged that the prevalence of CBS varies widely across studies due to differing definitions and patient populations, making comparisons difficult. They noted that their study's overall prevalence of 5.7% for CBS (or ~16% if non-complex visual perceptions were included) might be considered low compared to other studies reporting 30-60%. They also suggested that the direct, face-to-face questioning method used in their study might yield lower prevalence rates than anonymous methods like telephone interviews. The study's interview also did not include specific questions to evaluate social isolation, which is a potential factor in CBS. They concluded that specific diagnostic criteria for CBS are needed for future studies. |
| Cognitive impairment and Charles Bonnet syndrome: a prospective study | G. Russell, R. Harper, H. Allen, R. Baldwin, A. Burns | 2017 | UK | Prospective Cohort | 22 | Participants were people over 65 years old attending specialist eye hospital clinics for low-vision or glaucoma. All participants were able to read and write in English and had an informant available for collateral cognitive history. Those diagnosed with CBS met the Teunisse criteria, while individuals with existing dementia or other known causes of visual hallucinations were excluded at the initial assessment. | Two CBS participants (out of 12) developed dementia at the one-year follow-up, compared to no controls. These two individuals with CBS had displayed partial insight into their hallucinations and experienced familiar figures at the time of their CBS diagnosis, with one also having mild cognitive impairment (MCI) at the study's start. The study suggests that partial insight, MCI, and hallucinations of familiar figures might be associated with an increased risk of subsequent dementia in CBS patients. | The primary limitation was the small sample size, which proved challenging to recruit as only 17% of those screened positive for complex hallucinations completed the study. The authors noted that the one-year follow-up duration was arbitrary, suggesting that a longer follow-up might reveal more cases of dementia, and therefore, the study could not definitively rule out underlying brain abnormalities in those who did not develop dementia. The study also found no significant differences in performance on the Addenbrooke’s Cognitive Examination (ACE-R) between the groups at follow-up. |
| The Charles-Bonnet syndrome in patients with neovascular age-related macular degeneration - could proton inhibitor pumps play a role? | J. E. Leandro, J. Beato, A. C. Pedrosa, J. Pinheiro-Costa, M. Falcão, F. Falcão-Reis, Â. M. Carneiro | 2017 | — | Prevalence | — | The study involved patients with neovascular-AMD. The findings suggest that CBS primarily affects older individuals with poor visual acuity within this patient group. | The study concluded that the prevalence of CBS is high in neovascular-AMD patients, particularly in older individuals with poor visual acuity. A notable outcome was the finding that Proton Pump Inhibitors (PPIs) appeared to increase the risk of developing hallucinations, a risk that was seemingly independent of the degree of visual loss. | As an abstract from an annual meeting, the provided information is concise and does not explicitly list limitations. The phrasing "PPIs seem to increase the risk" suggests a preliminary association rather than a definitive causal link, implying that further investigation may be warranted. |
| The role of the retina in visual hallucinations: A review of the literature and implications for psychosis | F. Bernardin, R. Schwan, L. Lalanne, F. Ligier, K. Angioi-Duprez, T. Schwitzer, V. Laprévote | 2017 | — | Review | — | — | — | — |
| Visual acuity and contrast sensitivity are two important factors affecting vision-related quality of life in advanced age-related macular degeneration | M. Roh, A. Selivanova, H. J. Shin, J. W. Miller, M. L. Jackson | 2018 | USA | Retrospective | 47 | The participants were patients with bilateral AMD, with a mean age of 83.2 years. They had consented to participate in a Vision Rehabilitation registry. | The study found that CBS was not significantly associated with either the visual functioning scale (p = 0.44) or the socioemotional functioning scale (p = 0.50) of Vision-Related Quality of Life (VRQoL). Instead, visual acuity and contrast sensitivity were identified as important factors affecting VRQoL in these patients. | Key limitations included a small sample size and the retrospective nature of the study. The study also only assessed central visual field loss, not peripheral. Furthermore, patients with possible peripheral vision loss (e.g., concomitant glaucoma) were excluded, and the findings may not be generalizable to other diseases causing central visual field loss. Another important note is that the study did not present a detailed definition of CBS or the methods used to ensure its correct diagnosis, which could have led to over- or underreporting of CBS. |
| Looking at Charles Bonnet Syndrome: Prevalence and Experiences of Patients Attending a Vision Rehabilitation Clinic | L. M. Ord, A. Henderson, R. M. Christiansen | 2018 | USA | Retrospective | 100 | The participants were adult patients with visual impairments who were seen consecutively in a vision rehabilitation clinic and had a visual acuity worse than 20/70 best corrected in the better eye. Data collected included age, gender, eye condition (with macular disease being the most common, followed by animals and then buildings/structures), current medications, other medical diagnoses, and living situation. | The study found a CBS prevalence of 25.0% (n = 23) among eligible patients with visual impairments. The most common hallucinations reported were images of people (35%), followed by animals (26%), buildings/structures (17%), other objects (17%), shapes/patterns/colors (14%), and flowers/plants (9%). One patient reported Lilliputian images (smaller than real-life images). | The study acknowledged that there are no standardized diagnostic criteria for CBS, and its findings are based on a specific questioning method which is designed to be non-threatening. It notes that individuals with CBS are often hesitant to disclose their experiences due to fear of being perceived as having dementia or psychosis. The study highlights the importance of integrating CBS screening into care planning for vision professionals. |
| The experiences of visually impaired military veterans with Charles Bonnet syndrome | S. Dave, L. Jones, M. Lee, L. Ditzel-Finn, C. Castle, N. Heinze, J. Potts, M. Moosajee, R. S. M. Gomes | 2018 | UK | Cross-sectional | 46 | The participants were visually impaired military veterans who were members of Blind Veterans UK. Their average age was 79.9 years, and the sample was predominantly male (84.8%). They had self-reported CBS, including simple, complex, or both types of hallucinations. | The study identified four overarching themes: the impact of CBS, understanding and management of CBS, awareness of CBS, and recommendations. Negative impacts included feelings of fear, annoyance, and disruptions to daily life and quality of life. A key finding was that increased knowledge and understanding of CBS provided reassurance and was considered an effective strategy to mitigate the negative emotional impact of the condition. | The findings are not generalizable to people without a military background or to younger populations, as the study cohort consisted exclusively of military veterans with an average age of approximately 80 years. The study also had a low participation rate (40%) and did not include specific assessments for conditions like PTSD or detailed information on medications, which could influence the results. Additionally, visual acuity data might have been outdated, and visual field data was not collected. |
| Hallucinatory experiences in visually impared individuals: Charles Bonnet syndrome - implications for research and clinical practice | D. Jurišić, I. Sesar, I. Ćavar, A. Sesar, M. Živković, M. Ćurković | 2018 | — | Review | — | — | — | — |
| Health Service research Family physician awareness of Charles Bonnet syndrome | K. D. Gordon, T. Felfeli | 2018 | Canada | Cross-sectional | 449 | — | The study revealed a significant lack of awareness of CBS among family physicians in Canada, with 54.7% reporting no awareness and an additional 19.7% having only slight awareness, meaning approximately 75% had low or no familiarity with the syndrome. Despite this, a large proportion (72.8%) of these physicians had attended to patients experiencing visual hallucinations at least once a year. The frequency of encountering patients with visual hallucinations was significantly associated with a physician's awareness of CBS. Furthermore, 85% of respondents stated they never discussed the possibility of CBS with patients presenting with low vision. For those who did encounter patients with visual hallucinations, the majority (77.4%) provided counselling or education, while 33.1% referred to a psychiatrist, 27.4% to an ophthalmologist, and 16.1% to a neurologist. | Several limitations were noted for this study, including concerns about the representativeness of the sample due to the faxed survey method. The inclusion of a background explanation of CBS within the survey itself might have inadvertently inflated reported awareness levels by stimulating recall among respondents. Additionally, the study did not record how long physicians had been in practice, making it impossible to determine if knowledge had simply been forgotten over time. Responses regarding the frequency of patient encounters were based on recall and should therefore be interpreted as indicative of practice patterns rather than precise data. Overall, the study underscores the critical need for greater awareness and education about CBS among family physicians to facilitate appropriate diagnosis, assessment, and treatment, and to provide reassurance to patients that their hallucinations are not indicative of a mental disorder. |
| Bonnet’s syndrome in ophthalmology: literature review | A. Lindaura, C. Augusto, A. Da Rocha Lucena, M. Lys, C. Augusto, A. G. Matos | 2018 | — | Review | — | — | — | — |
| Screening for Charles Bonnet syndrome: Should the definition be reconsidered? | P. Satgunam, R. Sumalini, G. Chittapu, G. Pamarthi, B. Holden | 2019 | India | Cross-sectional | 218 | The patient characteristics for this study included individuals with visual impairment (VI) attending a tertiary eye care center. These participants ranged in age from 18 years and above, with a mean age of 49.2 ± 17.3 years. Patients with neurological conditions were excluded, and only those who passed the Rowland Universal Dementia Assessment Scale (RUDAS) with a score of 23 or more were included to ensure the absence of significant cognitive impairment. The cohort comprised 139 males and 71 females, with similar mean ages. | The study's primary outcomes indicated a prevalence of CBS of 6.7% among patients with visual impairment at their center, based on the strict definition of visual hallucinations alone. However, when including patients who reported visual hallucinations accompanied by a relevant auditory input, the prevalence increased to 8.1%. A notable finding was that all patients diagnosed with CBS maintained complete insight into the unreal nature of their hallucinations. Furthermore, none of the 17 patients identified with CBS had previously reported their visual hallucinations to their eye care professionals. | Several limitations were acknowledged for this study. The absence of a standardized, validated survey for diagnosing CBS meant the study relied on a newly designed nine-question survey that underwent pilot testing but no further validation. The retrospective nature of some of the data and the cross-sectional design limit the ability to draw conclusions about the course or long-term impact of CBS. The study also did not include hearing tests for patients experiencing visual hallucinations with associated auditory input, which could have provided further insights. There is a recognized potential for underestimation or overestimation of CBS prevalence due to patients' reluctance to disclose symptoms (fearing a mental illness label) and the reliance on a single, leading question for screening. Additionally, the use of a single question from the Washington disability questionnaire for cognitive screening, rather than a full assessment, was noted as a potential limitation for accurately determining CBS prevalence. The study's focus on a single tertiary center in India means its findings may not be generalizable to broader populations without further multi-center research. |
| Prevalence of visual hallucinations | S. Marmamula, R. Sumalini, T. K. Reddy, S. M. Brahmanandam, P. Satgunam | 2019 | India | Cross-sectional | 4936 | The participants were aged 40 years and older, with a mean age of 55.6 ± 11.8 years. The cohort included 2,174 males and 2,762 females, encompassing various education levels and categories of visual impairment. | The study found a prevalence of visual hallucinations of 13.8% among individuals with visual impairment in the studied population. Older age (70 years and above) and moderate visual impairment were identified as factors associated with experiencing visual hallucinations. | The prevalence of visual hallucinations was self-reported based on a single, leading question, which could lead to an over- or underestimation, partly due to cultural reluctance to disclose such experiences. The study did not categorize participants by the extent of visual field loss, and a single question from the Washington disability questionnaire was used for cognitive screening, rather than a full validated instrument, which means the identified visual hallucinations may not necessarily equate to a confirmed CBS diagnosis. |
| The elephant in the room: understanding the pathogenesis of Charles Bonnet syndrome | K. Carpenter, J. K. Jolly, H. Bridge | 2019 | — | Review | — | — | — | — |
| Evaluation of the Clinical Features, Management, and Prognoses of Patients With Charles Bonnet Syndrome | H. Buyukgol, F. Ilik, D. H. Ertem | 2019 | Turkey | Retrospective | 13 | All included patients experienced visual hallucinations, but were confirmed to be normal on cognitive and psychiatric assessments and maintained awareness that their images were not real. The most common cause for CBS among these patients was senile macular degeneration, with glaucoma and cataracts also being frequent ocular etiologies, while occipital infarct was the most common nonocular cause. The study notes that CBS can occur in individuals of all ages and that no significant differences between sexes have been described in other literature. | All patients experienced either simple or complex visual hallucinations, which typically lasted less than 12 months. Regarding management, antipsychotic agents like risperidone and quetiapine, and anticonvulsants such as levetiracetam, showed effectiveness in some cases. Specifically, at 3-month follow-up, risperidone was effective in 2 out of 4 patients, quetiapine in 2 out of 4, and levetiracetam in 1 out of 2. | Key limitations included a short follow-up period and the exclusive use of single oral medications. The authors also acknowledge that the reported frequency of CBS might be underestimated due to patients' reluctance to disclose symptoms for fear of being labeled with a mental disorder. Despite these limitations, the study included detailed neuropsychiatric and ophthalmological examinations and imaging to investigate structural abnormalities. |
| Charles Bonnet syndrome: development and validation of a screening and multidimensional descriptive questionnaire | S. Cantin, J. Duquette, F. Dutrisac, L. Ponton, M. Courchesne, W. D. A. Cybis, K. Montisci, W. Wittich, M.-C. Wanet-Defalque | 2019 | Canada | Pilot | 78 | Participants in the validation study had low vision, with visual acuity less than 0.2 logMAR, and their ages ranged from 48 to 102 years, with a mean of 72.3 ± 11.9 years. The cohort consisted of 48 women and 30 men, and the most common diagnosis among them was AMD. Patients were screened using the MoCA-Blind to ensure the absence of mild cognitive impairment. | The developed questionnaire, named QR-SCB, features a subset of 11 closed-ended questions that demonstrated a sensitivity of 1.00 and a specificity of 0.77 for detecting CBS. The improved version of the questionnaire comprises 55 questions grouped into 8 dimensions, operationalizing screening through an algorithm applied to 13 questions. | The questionnaire, while useful for screening, needs to be supplemented by a focused low vision interdisciplinary assessment, including a visual examination and a clinical interview with a psychologist for a complete diagnosis. The study highlights that there was previously no validated tool available to screen for CBS. The administration of the QR-SCB in the clinical study took between 15 and 45 minutes, and qualitative improvements were made to the wording and structure of some questions not used for screening. |
| The Charles Bonnet Syndrome: a Systematic Review of Diagnostic Criteria | A. G. Hamedani, V. S. Pelak | 2019 | USA | Systematic Review | — | — | — | The study highlighted the inconsistent and variable definition of CBS in the scientific community, particularly regarding the severity of vision loss, the inclusion or exclusion of cognitive impairment, and the methods for assessing these factors. This heterogeneity can lead to biased prevalence reports and impact the comparability and generalizability of research findings. The lack of a unified definition underscores the urgent need for standardized diagnostic criteria for CBS. |
| Prevalence of Charles Bonnet syndrome in patients with age-related macular degeneration: systematic review and meta-analysis | S. Niazi, M. K. Nielsen, A. Singh, T. L. Sørensen, Y. Subhi | 2020 | USA, Canada, UK, Croatia, Denmark, Portugal, Turkey, China, Singapore | Systematic Review and Meta Analysis | 4303 | The meta-analysis focused on patients with AMD. The reviewed studies included populations with varying characteristics, such as those in active treatment for neovascular AMD, patients with bilateral AMD, and those attending vision rehabilitation centers. Patients with CBS were generally older with lower best-corrected visual acuity (BCVA) in their best-seeing eye, and there was a higher proportion of females among those with CBS. Most studies required normal mental state as an eligibility criterion or part of the CBS definition. | The overall pooled prevalence of CBS in patients with AMD was found to be 15.8% (95% confidence interval: 11.0%–21.2%). Subgroup analyses revealed that prevalence varied significantly based on the study population: 7.2% in consecutively recruited neovascular AMD patients, 32.4% in patients with bilateral AMD, and 31.6% in patients attending visual rehabilitation centers. Female sex was a significant risk factor (13% more females among those with CBS), and patients with CBS had a significantly worse BCVA in their best-seeing eye. | Key limitations included that CBS diagnoses were mostly based on screening questions and unstructured interviews rather than validated questionnaires. The studies reviewed exhibited significant heterogeneity in study populations and AMD definitions, making direct comparisons challenging. Many studies also lacked detailed information on diagnostic protocols, AMD subtypes, time periods of inclusion, and consecutive recruitment, which could introduce bias. The authors emphasized the importance for clinicians to discuss CBS with patients to provide help and relief, as awareness of CBS among patients with retinal diseases is limited. |
| Prevalence of Charles Bonnet syndrome in patients with glaucoma: a systematic review with meta-analyses | Y. Subhi, D. C. Schmidt, D. Bach-Holm, M. Kolko, A. Singh | 2020 | Denmark, Sweden | Systematic Review and Meta Analysis | 827 | The study populations were predominantly elderly individuals with glaucoma. These patients represented broad ranges of glaucoma stages and often had various ocular comorbidities. The populations included those seen at university clinics, those with bilateral low visual acuity, and those attending vision rehabilitation clinics. | The pooled prevalence of CBS in patients with glaucoma varied by population group: 2.8% in general glaucoma patients at university clinics, 13.5% in glaucoma patients with bilateral low visual acuity, and 20.1% in glaucoma patients attending vision rehabilitation clinics. Risk factors for CBS identified in the included studies included high age, female gender, reduced contrast sensitivity, and not living alone, though conclusive evidence on these risk factors was limited due to the small number of studies. | The study highlighted several limitations, including the limited number of studies available, which affected the certainty of their summary measures. There was also a lack of detailed information regarding ocular comorbidities and a varied approach to diagnose and define CBS across the included studies, as validated questionnaires for CBS were not widely available at the time. The high mean age of study populations meant that age-related ocular comorbidities could act as a significant source of bias. The authors emphasized the need for more well-designed, glaucoma-specific studies. |
| Charles Bonnet syndrome: low awareness among patients with glaucoma | S. Molander, D. Peters, A. Singh | 2020 | Sweden | Cross-sectional | The study focused on patients with a known diagnosis of Primary Open-Angle Glaucoma (POAG). These were elderly individuals, with a median age of 78-83 years, and a male-to-female ratio of approximately 1:1, or slightly more males in the non-CBS group. Patients with concurrent neurological/psychiatric disorders or other known causes of vision loss were excluded. | The study found very low awareness of CBS among patients with glaucoma; only 4 out of 338 patients (approximately 1.2%) reported having heard or read about CBS. There were no statistically significant differences in age, gender, visual field parameters, best corrected visual acuity (BCVA), laterality of glaucoma, or macular pathology between those who had knowledge of CBS and those who did not. | The study found very low awareness of CBS among patients with glaucoma; only 4 out of 338 patients (approximately 1.2%) reported having heard or read about CBS. There were no statistically significant differences in age, gender, visual field parameters, best corrected visual acuity (BCVA), laterality of glaucoma, or macular pathology between those who had knowledge of CBS and those who did not. | The study acknowledged that its results may not be applicable to all populations due to regional and/or cultural differences in available online knowledge and CBS prevalence. Selection bias may have occurred as some patients refused to participate. Additionally, due to the very low proportion of patients with CBS knowledge, comparisons of demographic and clinical data between groups were associated with uncertainty. The study also noted that patients might misinterpret the questionnaire or have difficulty recalling information. |
| Visual hallucinations and sight loss in children and young adults: a retrospective case series of Charles Bonnet syndrome | L. Jones, M. Moosajee | 2020 | UK | Case series | 13 | The study focused on children and young adults (patients under 25 years old) with sight loss. Specifically, 5 of these 13 patients had Stargardt disease (STGD1). | The study described the clinical profiles and the occurrence of CBS phenomena in this younger population with sight loss. It identified that 13 patients in this case series experienced visual hallucinations consistent with CBS. | As noted by other sources, while this study and others like it provided initial insights into CBS in young people, they were limited in fully elucidating the patients’ lived experience of the condition. |
| Clinical characteristics of the Charles Bonnet syndrome in patients with neovascular age-related macular degeneration: the importance of early detection | J. E. Leandro, J. Beato, A. C. Pedrosa, J. Pinheiro-Costa, M. Falcão, F. Falcão-Reis, Â. M. Carneiro | 2020 | Portugal | Cross-sectional | 500 | The study focused on patients with neovascular AMD attending an eye clinic. | The study found that 33% of CBS patients reported that their visual hallucinations interfered with daily activities, and specifically 13% indicated difficulties 'moving about'. Furthermore, 33% of CBS patients were classified as having 'negative outcome CBS', which was significantly associated with the hallucinations affecting daily activities (p = 0.015). | While specific limitations for this study are not explicitly detailed in the provided summary, general challenges in CBS research highlighted in the context of this study include variations in diagnostic and eligibility criteria, and reliance on patient recollection which can introduce recall bias. |
| An overview of psychological and social factors in Charles Bonnet syndrome | L. Jones, L. Ditzel-Finn, J. Enoch, M. Moosajee | 2021 | — | Review | — | — | — | — |
| Charles Bonnet syndrome prevelence in a younger ophthalmology outpatient population | A. Karagöl | 2021 | Turkey | Cross-sectional | 28 | The study focused on younger ophthalmology outpatients, specifically individuals aged between 18-60 years old at the time of enrollment. These patients presented with relatively mild eye diseases such as myopia and astigmatism. The mean age for patients with CBS in this study was 39.40 years. | The study found a CBS prevalence of 5 out of 28 patients, approximately 17.9%, in this younger outpatient population. This suggests that CBS can also occur in younger age groups with relatively mild eye diseases. The reported locations of hallucinations were in the corner of the eye or directly where the person looked. | A primary limitation is the small sample size of 28 patients, which limits the generalizability of the findings. The study also highlighted the challenge that patients may experience "apprehension of stigmatization" and be reluctant to report symptoms, suggesting that direct inquiry during clinical examination is important. The authors aimed to address a gap in the literature where most CBS studies focused on older populations. |
| How do the blind 'see'? The role of spontaneous brain activity in self-generated perception | A. Hahamy, M. Wilf, B. Rosin, M. Behrmann, R. Malach | 2021 | UK | Experimental | 29 | The CBS group consisted of late-onset blind/visually-impaired individuals with a mean age of 47 ± 8.9 years, including two females. All participants in the study, across all groups, had no history of psychiatric illness or cognitive impairments and were not taking psychoactive medications. | The study aimed to understand the phenomenon of complex visual hallucinations in individuals with marked visual impairment by examining the role of spontaneous brain activity, particularly in high-order visual areas. However, the provided excerpts do not detail specific quantitative or qualitative outcomes regarding brain activity or hallucination characteristics, only the study's purpose. | The provided excerpts do not explicitly state specific limitations for this study. However, it is noted that the experimental groups were well-matched for age, gender, and handedness. The research focused on studying genuinely un-prompted perceptual behavior to understand natural human brain activations. |
| Charles Bonnet syndrome in patients with Stargardt disease: prevalence and risk factors | P. P. A. Dhooge, R. J. Teunisse, B. Liefers, S. Lambertus, N. M. Bax, C. B. Hoyng, J. R. M. Cruysberg, B. J. Klevering | 2021 | Netherlands | Prevalence | 83 | The study focused on patients with Stargardt disease (STGD1), which is the most common juvenile macular dystrophy causing visual loss typically in the teens. The mean age of the patient cohort was 46 ± 16 years, and 6 out of the 7 CBS patients were women. All seven CBS patients were in the vision impairment category (visual acuity <6/12, but ≥3/60). | The prevalence of CBS in this STGD1 cohort was found to be 8.4% (7 out of 83 patients). The study identified social isolation and acquired vision impairment as risk factors for CBS, with CBS patients having significantly lower social functioning scores. First hallucinations appeared after a drop in visual acuity. | A primary limitation was the small sample size, which limited statistical power and the generalizability of the findings. The authors note that a multi-centre study with a larger, geographically independent cohort is needed to establish the true prevalence of CBS in STGD1. Age and retinal pigment epithelium atrophy were not identified as significant risk factors in this cohort. |
| Benefit of psychiatric evaluation on anxiety in patients with Charles Bonnet syndrome | B. Doeller, M. Kratochwil, L. Sifari, N. Hirnschall, O. Findl | 2021 | Australia | RCT | 4900 | The study focused on patients with significantly reduced vision (visual acuity of 0.5 LogMAR or worse in the better eye) and a minimum age of 55 years. The average age of CBS patients was 79.3 ± 9.7 years, with a female-to-male ratio of 4:1. Patients with psychiatric/neurological pathologies (e.g., dementia or Parkinson’s disease) were excluded. | The study found a CBS prevalence of 8.7% among the included patients. The most common types of visual hallucinations observed were humans (41%), followed by geometrical shapes/patterns (32%), plants (15%), and animals (12%). While patients benefited from learning about CBS and being reassured that no mental illness was involved, the study did not show a statistically significant difference in the change in quality of life between patients who consulted an ophthalmologist and those who received additional psychiatric assessment and treatment (p=0.727). | The study acknowledged its small sample size in both the study and control groups. It also highlighted the impact of strict inclusion and exclusion criteria (e.g., excluding psychiatric/neurological pathologies and differentiating between simple and complex visual hallucinations) on the reported CBS prevalence, suggesting prevalence would be much higher without these criteria. The authors noted the lack of standardized diagnostic criteria for CBS in the literature as a challenge. |
| Charles Bonnet Syndrome in Patients with Open-Angle Glaucoma Prevalence and Correlation to Visual Field Loss | Peters D., Stellan M., Trine L., Amardeep S. | 2022 | Sweden | Cross-sectional | 337 | Participants were adult patients (n=337) with manifest open-angle glaucoma (OAG) with verified visual field loss, and without significant macular disease or other extraocular conditions known to cause visual hallucinations. The mean age of participants was 77.7 ± 8.3 years, with 55% being female. | The study found a prevalence of CBS of 7.1% in this OAG patient group. CBS patients had a significantly worse best-corrected visual acuity (BCVA) in their worse-seeing eye and a higher level of visual field loss (VFL) in the better eye compared to controls. A tendency was observed for an increased prevalence of CBS in patients with bilateral glaucoma, although this was borderline significant. | The study acknowledged limitations including its single-center design and a sample size that, while relatively large, was too small to allow for subgroup stratification based on different stages of glaucoma. The strict inclusion criteria (e.g., confirmed glaucomatous VFL, exclusion of significant macular disease) aimed to reduce bias but also meant that patients with very advanced glaucoma or newly diagnosed glaucoma were not included. The authors also noted the lack of unified diagnostic criteria for CBS in the scientific community as a limitation that affects comparability with other studies. |
| The Incidence and Characteristics of Charles Bonnet Syndrome in a Large Cohort of Leber's Hereditary Optic Neuropathy Patients | H.-A. Nguyen, M. Kreimei, E. Mollanji, L. Poincenot, R. Karanjia | 2022 | Canada | Prospective Cohort | 155 | The study exclusively investigated patients with Leber’s Hereditary Optic Neuropathy (LHON). The screening questionnaire used was specifically tailored to this patient group. | The primary purpose of the study was to be the first to screen for and characterize the incidence and characteristics of CBS within a large cohort of LHON patients. The provided excerpts do not detail specific quantitative or qualitative outcomes regarding the prevalence or nature of hallucinations found. | The study aimed to address the fact that CBS is "not well characterized nor routinely assessed for" in patients with LHON. It also highlights that the questionnaire was "adapted" to an online bilingual format. The excerpts do not explicitly list further limitations. |
| Prevalence of Charles Bonnet syndrome among UK visually impaired military veterans and associated impact of visual hallucinations during the COVID-19 pandemic | L. Jones, M. Lee, R. Gomes, M. Moosajee | 2022 | UK | Cross-sectional | 532 | The study focused on visually impaired military veterans who were members of Blind Veterans UK. The individuals completing the survey were, on average, older and experienced loneliness during the pandemic. A related study suggests the average age of participants was around 80 years. | The prevalence of CBS among this cohort of visually impaired military veterans was 12.9% (95% CI: 11.1%-14.7%). The study found that loneliness during the COVID-19 pandemic was associated with changes in the nature of visual hallucinations (p=0.04), and approximately half of the survey respondents experienced an exacerbation of their visual hallucinations. Despite these experiences, most individuals had not accessed support services. | Key limitations include its single-center design based on a specific UK charity, which restricts the generalizability of the findings to the broader population without a military background. The study also notes a small sample size (n=45) for the survey and a low participation rate (40%) for interviews, potentially affecting representativeness. Furthermore, the study did not specifically assess for PTSD, which is prevalent in veterans and could influence findings, and there was a lack of updated visual acuity and visual field data for participants. |
| Investigation of structural brain changes in Charles Bonnet Syndrome | M. J. Firbank, K. D. Morgan, D. Collerton, G. J. Elder, J. Parikh, K. Olsen, J. Schumacher, D. Ffytche, J.-P. Taylor | 2022 | UK | Cross-sectional | 52 | The three groups (CBS, Control-ED, and Sighted Control) were well-matched for age, sex, and cognitive scores (MMSE), with the two eye disease groups also matched on visual acuity. Patients with eye disease (CBS and Control-ED) were required to have an MMSE-blind score greater than 24 and no concurrent major psychiatric or neurological disease, including dementia. Most eye patients had macular disease as their primary pathology. | The study found reduced grey matter in the occipital cortex and reductions of fractional anisotropy and increased diffusivity in widespread areas (including occipital tracts, corpus callosum, and anterior thalamic radiation) in both eye disease groups compared to sighted controls. However, there were no significant structural differences found between eye disease participants with visual hallucinations (CBS) versus those without visual hallucinations (Control-ED), though a negative association between hippocampal volume and visual hallucination severity was observed within the CBS group. | The study acknowledges that its participants were relatively old, which might limit the generalizability to younger-onset CBS where neurodegenerative changes are less likely. The inclusion of patients with various eye diseases, not solely macular disease, could also increase the heterogeneity of brain changes and visual hallucination types. Despite these, it is noted as the largest MRI study in CBS to date, and its findings suggest that structural changes alone do not explain visual hallucinations, implying a role for connectivity or excitability changes in brain networks. |
| Shedding Light on Charles Bonnet Syndrome: An In‐Depth Analysis in South Gujarat | S. S. Saiyad, H. R. Suthar, M. K. Bhabhor, A. R. Vara, H. R. Suthar | 2023 | India | Cross-sectional | 250 | Participants were 250 individuals, aged 18 years or older, with best-corrected visual acuity of 6/12 or lower, recruited from ophthalmology and psychiatric clinics. They were excluded if they had confirmed psychiatric disorders with hallucinations, used hallucination-associated medications, experienced non-visual hallucinations, or consumed alcohol actively. | The study found a prevalence of CBS of approximately 5% within the targeted sample. Among the participants with CBS, 80% were female, 80% exhibited full insight into the unreal nature of their hallucinations, and 60% reported repetitive hallucinatory experiences occurring on a monthly basis. | A primary limitation was the small sample size, which means the findings, particularly regarding gender disparity, should be interpreted with caution. The authors emphasize the need for future research with larger and more diverse cohorts to validate and expand upon these findings. The study also highlights the importance of increased awareness of CBS among healthcare providers and the general public. |
| Charles Bonnet syndrome in age-related macular degeneration - prevalence and clinical features in a Portuguese population | M. Portela, P. Arede, M. Picoto, F. Vaz | 2023 | Portugal | Cross-sectional | 100 | The study included 100 consecutive patients with late-stage AMD (AREDS 4) who had no history of psychiatric or neurological disease. Participants were actively screened for CBS symptoms, and those experiencing floater, shadows, and flashing lights were not considered to have CBS. | The study found a CBS prevalence of 8% among this population. Factors significantly associated with CBS included advanced age (+6.3 years; p=0.003), lower best-corrected visual acuity in the better eye (CBS group: 0.11; Non-CBS group: 0.42; p=0.005), and female sex (CBS group: 88%; Non-CBS group: 43%; p=0.02). The most common hallucinations were described as images of a person, with movement and color, occurring straight ahead, once per day, lasting for minutes, and disappearing after blinking or looking away. Many patients with CBS lived alone and associated the episodes with severe distress, but most had not shared their condition with anyone. | A primary limitation was the small number of CBS cases identified, which restricted the analysis of other potential risk factors. The study emphasizes the importance of directly asking patients about CBS, as they are often reluctant to disclose visual hallucinations due to fear of mental illness. The recruitment method of consecutively enrolled patients is considered more representative of daily clinical practice. |
| Impact of Charles Bonnet Syndrome on visually impaired older adults' ability to engage in physical activity: A scoping review | K. Fisher, C. Sanders, E. Stanmore | 2023 | — | Review | — | — | — | — |
| Charles Bonnet Syndrome Adversely Affects Vision-Related Quality of Life in Patients with Glaucoma | P. Randeblad, A. Singh, D. Peters | 2024 | Sweden | Cross-sectional | 66 | Participants were adult patients with open-angle glaucoma (OAG) who had verified visual field (VF) loss and no significant macular disease or other conditions known to cause visual hallucinations. The CBS and control groups were carefully matched for disease stage, best-corrected visual acuity (BCVA), and age. | The study determined that CBS had a significant negative association with Vision-Related Quality of Life (VRQoL) in patients with glaucoma when compared to a matched control group. While initial information about CBS provided during screening may offer relief, the study did not assess whether this information alone impacted VRQoL. | A key limitation was the small sample size, which restricted subgroup analysis based on different stages of glaucoma. The study was also conducted at a single center, which may affect the generalizability of its findings. However, a strength was the use of strict inclusion criteria to ensure that only CBS cases attributable to glaucoma were included. |
| Prevalence of Charles Bonnet Syndrome (CBS) in patients with vitreoretinal and inherited retinal disease | M. Naik, Y. Bakr, A. Y. Ong, B. Ip, S. M. Downes, P. C. Issa, S. Aslam, J. K. Jolly | 2024 | UK | Prospective Cohort | 340 | The study screened patients attending retinal genetics and vitreoretinal (VR) clinics who had vitreoretinal (VR) and inherited retinal diseases (IRD). | The study's purpose was to understand the prevalence, epidemiology, and characteristics of CBS in patients with VR and IRD. For patients who screened positive for CBS symptoms, the study aimed to confirm the diagnosis and explore the characteristics of their hallucinations, coping strategies, context of appearance, psychological impact, and social support. However, the specific prevalence rates or detailed findings of these outcomes are not provided in the given excerpt. | The provided abstract does not explicitly state any limitations of the study. |
| Emotional well-being in Charles Bonnet syndrome: exploring associations with negative affect, loneliness and quality of life | B. Higgins, D. Taylor, D. Crabb, T. Callaghan | 2024 | UK | Cross-sectional | 126 | Participants were adults aged 18 years or older with self-reported CBS (either past or ongoing symptoms) and impaired vision from any cause, but no self-reported cognitive impairments. The cohort was predominantly female (77%) and over 65 years old (84%), with AMD (57%), Glaucoma (10%), and DR (5%) being common visual impairments. | The study found that over half of the respondents rated the impact of CBS on their life as negative, with no participants reporting a "very pleasant" impact. Participants who reported a negative impact of CBS were more likely to report higher levels of negative affect and greater feelings of loneliness. | The study's cross-sectional design prevents the assumption of a causal relationship between CBS impact and emotional well-being or loneliness. Reliance on self-reported cognitive defects and the predominantly female and older demographic, along with the lack of ethnicity data, may limit the generalizability of the findings. The study also did not assess whether initial information about CBS provided during screening impacted Vision-Related Quality of Life. |
| Epidemiology and phenomenology of the Charles Bonnet syndrome in low-vision patients | S. E. G. Christoph, K. T. Boden, A. Pütz, K. Januschowski, R. Siegel, B. Seitz, P. Szurman, A. Schulz, K. Heimann | 2024 | Germany | Cross-sectional | 194 | The study included adult patients (≥ 18 years old) with low vision, defined as a visual acuity (VA) ≥ 0.5 logMAR. Patients with cognitive impairment, other causes of visual hallucinations, or those using psychoactive substances were excluded. The average age of the included patients was 75.2 ± 9.49 years. | The study found a CBS prevalence of 26.0% among low-vision patients. While age and mean best-corrected visual acuity (BCVA) did not significantly differ between CBS and non-CBS groups, a higher, though not statistically significant, proportion of females was noted in the CBS group. The most common hallucinations were images of animals, often occurring during the day, in bright surroundings, lasting seconds, and generally not moving with eye movements. | The study was limited by its small sample size of 50 patients, the interview design, and the single study setting, which may affect the reliability and generalizability of the results. The cross-sectional design also meant that the course of hallucinations over time could not be evaluated. The authors noted that patients often do not communicate their hallucinations due to fear of being labeled as "mentally ill". |
| Practice patterns in reporting and documentation of Charles Bonnet syndrome: a retrospective review following COVID-19 | D. Abdulhussein, L. Jones, H. Dintakurti, M. Moosajee | 2024 | UK | Retrospective | 311 | Patients were visually impaired individuals aged 16 years or older with suspected CBS. The cohort was predominantly female (64.8% pre-pandemic, 59.4% peri-pandemic) and had an average age around 76-77 years, with medical retina being the most common subspecialty where CBS was reported. Patients generally recorded low levels of best-corrected visual acuity (BCVA). | The study found that while the number of new CBS diagnoses was similar across the two intervals, documentation of management strategies significantly improved during the peri-pandemic period (from 68.6% with no details to 49.0%). CBS was most commonly reported in medical retina clinics, and patient-reported impact and specific hallucination types were seldom documented. | The study's retrospective design and reliance on selected search terms mean that the total number of CBS cases is likely an underestimation, as patients often do not volunteer information about their symptoms due to fear. The findings from this single tertiary eye center in London may also limit their generalizability. |
| They're creepy creatures with human-like features': children's experiences of visual hallucinations in Charles Bonnet syndrome-a qualitative study | L. Jones, L. Ditzel-Finn, L. Mcdonald, M. Moosajee | 2025 | UK | Cross-sectional | 10 | Participants were children aged 7–15 years with an inherited retinal disease (IRD) living with CBS along with their parents. The average age of the children at the time of interview was 11 ± 2.9 years, with diagnoses including inherited retinal dystrophy and hereditary optic neuropathy. | The study found that CBS had a broad and heterogeneous negative impact on daily life, causing considerable upset with long-standing residual effects for the children and their families. Participants often experienced frightening complex hallucinations, significant issues with sleeping, compromised physical safety, and social isolation. Limited awareness and suboptimal healthcare support further complicated the children's ability to understand and manage their hallucinations. | The study's limitations include its small sample size and being conducted solely in the UK, which may limit the transferability of the findings. While dyadic interviews could have influenced responses, they also enriched the data. Notably, all families reported distressing hallucinations, suggesting children might be more susceptible to clinically significant CBS, potentially compounded by a diminished ability to distinguish hallucinations from reality. |
| Visual cortical activity in Charles Bonnet syndrome: testing the deafferentation hypothesis | K. D. Morgan, D. Collerton, M. J. Firbank, J. Schumacher, D. H. Ffytche, J.-P. Taylor | 2025 | UK | Experimental | 37 | Participants were older adults (mean age 79 years) with eye disease and either CBS or no visual hallucinations, carefully matched for age and visual acuity. All individuals had intact global cognitive function (MMSE-Blind score ≥24) and no history of psychiatric or neurodegenerative illness, or moderate-to-severe cerebrovascular disease or epilepsy. | The study found a pattern of altered visual cortical activity in people with CBS, demonstrating reduced BOLD activation in ventral extrastriate and primary visual cortex, and reduced EEG alpha-reactivity to visual stimulation compared to ED-Controls. The CBS group also exhibited a shift towards lower frequency band oscillations (increased occipital theta power) and a significant association between reduced activation and increased excitability (reduced TMS phosphene thresholds), which correlated with increased hallucination severity. These results support the deafferentation hypothesis, linking increased visual cortical excitability to the formation of visual hallucinations. | A limitation was the small overall sample size, though it was considered relatively large for neurophysiological or imaging studies of CBS. The findings may not be representative of younger onset CBS patients, as the cohort was predominantly elderly. Furthermore, the study could only provide evidence for potential trait differences in cortical activity, as investigations were mostly conducted when participants were not actively hallucinating, which limited conclusions on activity changes during the hallucination state. |
| The prevalence of Charles-Bonnet syndrome in ophthalmic patients: A systematic review and meta-analysis | S. E. G. Christoph, K. T. Boden, R. Siegel, B. Seitz, P. Szurman, A. Schulz | 2025 | Germany | Systematic Review and Meta Analysis | 20303 | The study included ophthalmic patients with a wide range of eye diseases, such as retinal diseases (e.g., AMD, Stargardt disease, retinitis pigmentosa), glaucoma, and low vision. The population also included vision rehabilitation patients, leprosy patients, geriatric patients, and visually impaired children. CBS patients were, on average, slightly older than non-CBS patients, and female sex was identified as a risk factor. | The overall prevalence of CBS in the literature was found to be 10.2% (95% confidence interval: 7.23% – 14.1%). Vision rehabilitation patients showed the highest prevalence at 24.6%. Patients with retinal diseases, low vision, and glaucoma had similar CBS rates, ranging from 11.8% to 17.7%. Both age (p = 0.0013) and sex (p = 0.003) were statistically significantly correlated with CBS prevalence. | The study acknowledged limitations due to the inconsistent definition of CBS among the scientific community, potentially leading to biased prevalence reports. A lack of validated screening tools and standardized questionnaires for CBS diagnosis was also noted. Furthermore, many included studies provided insufficient information on age and best-corrected visual acuity (BCVA) for both CBS and non-CBS groups, limiting statistical calculations. The meta-analysis also found that the association between BCVA and CBS prevalence was not statistically significant, which may be due to the limited sample size for this specific analysis. |
| Charles Bonnet syndrome in patients with geographic atrophy secondary to age-related macular degeneration: a cross-sectional study | N. S. Eriksen, N. Mousavi, Y. Subhi, T. L. Sørensen, M. K. Nielsen | 2025 | Denmark | Cross-sectional | 120 | The study included patients with GA secondary to AMD, with an average age of 82.1 ± 6.2 years, and 62% were female. Patients were inquired about hearing difficulties, living situation, medical history, and specifically any neurological or psychiatric diseases, as well as psychotropic use. | The prevalence of CBS was found to be 20.8% (25 out of 120 patients) in this population. No significant differences were found between CBS and non-CBS groups regarding age, sex, hearing difficulties, living alone, psychiatric/neurological comorbidities, or psychotropic use. A notable finding was that 52% of those with CBS had not been previously informed about the condition, and 40% had never told anyone about their experiences. | The study's limitations include reliance on patient recollection, which could lead to recall bias, and the inability to rule out other causes of hallucinations. Patients were not clinically examined at the time of the telephone interview, precluding the inclusion of up-to-date lesion size or visual acuity, and no power analysis was performed prior to inclusion. There is a potential for underestimation of the impact of CBS, as patients willing to participate might experience less distress. |
